# Supplementary material for: Insights into the Phytochemical Composition and Bioactivities of Seeds from Wild Peony Species
Source: PubMed Central journal article supplement (PMC7356631; doi:10.3390/plants9060729), 2020-06-09
Supplement: plants-09-00729-s001.pdf [file plants-09-00729-s001.pdf]

**Supplementary Materials:**
**Table S1.** Antimicrobial activities (MIC mg/ml) of seeds extracts from different species.

|     | <i>Listeria monocytogenes</i> | <i>Bacillus subtilis</i> | <i>Proteus vulgaris</i> | <i>Salmonella Typhimurium</i> | <i>Candida albicans</i> | <i>Microsporium gypseum</i> |
|-----|-------------------------------|--------------------------|-------------------------|-------------------------------|-------------------------|-----------------------------|
| P1  | 0.06 ± 0.02                   | 0.12 ± 0.02              | 0.25 ± 0.02             | 0.50 ± 0.04                   | 0.25 ± 0.02             | 0.25 ± 0.02                 |
| P2  | 0.25 ± 0.02                   | 0.12 ± 0.02              | 0.12 ± 0.02             | 0.50 ± 0.02                   | 0.25 ± 0.02             | 0.25 ± 0.04                 |
| P3  | 0.25 ± 0.02                   | 0.25 ± 0.04              | 0.5 ± 0.06              | 0.50 ± 0.06                   | 0.25 ± 0.02             | 0.25 ± 0.02                 |
| P4  | 0.50 ± 0.06                   | 0.12 ± 0.02              | 0.25 ± 0.02             | 0.25 ± 0.02                   | 0.25 ± 0.02             | 2.00 ± 0.08                 |
| P5  | 0.12 ± 0.02                   | 0.50 ± 0.06              | 0.50 ± 0.04             | 0.50 ± 0.04                   | 2.00 ± 0.02             | 0.25 ± 0.02                 |
| P6  | 0.25 ± 0.02                   | 0.25 ± 0.02              | 0.12 ± 0.02             | 0.50 ± 0.02                   | 2.00 ± 0.02             | 0.25 ± 0.04                 |
| P7  | 0.25 ± 0.04                   | 0.12 ± 0.02              | 0.50 ± 0.02             | 0.50 ± 0.02                   | 0.50 ± 0.02             | 0.25 ± 0.02                 |
| P8  | 0.25 ± 0.02                   | 0.25 ± 0.02              | 0.25 ± 0.04             | 0.50 ± 0.06                   | 2.00 ± 0.12             | 0.50 ± 0.06                 |
| P9  | 0.12 ± 0.04                   | 0.12 ± 0.02              | 0.50 ± 0.02             | 0.25 ± 0.02                   | 0.50 ± 0.02             | 2.00 ± 0.14                 |
| P10 | 0.03 ± 0.00                   | 0.12 ± 0.04              | 0.25 ± 0.04             | 0.50 ± 0.04                   | 2.00 ± 0.08             | 0.5 ± 0.02                  |
| P11 | 0.50 ± 0.04                   | 0.25 ± 0.06              | 0.50 ± 0.02             | 0.25 ± 0.02                   | 0.50 ± 0.06             | 0.50 ± 0.02                 |
| P12 | 0.12 ± 0.02                   | 0.12 ± 0.02              | 0.25 ± 0.02             | 0.25 ± 0.02                   | 0.50 ± 0.04             | 0.25 ± 0.02                 |
| P13 | 0.06 ± 0.02                   | 0.50 ± 0.06              | 2.00 ± 0.24             | 0.50 ± 0.02                   | 2.00 ± 0.24             | 0.25 ± 0.02                 |
| P14 | 0.25 ± 0.06                   | 0.06 ± 0.02              | 0.50 ± 0.04             | 0.50 ± 0.02                   | 0.25 ± 0.04             | 0.50 ± 0.02                 |
| P15 | 0.50 ± 0.04                   | 0.25 ± 0.02              | 0.50 ± 0.06             | 0.25 ± 0.02                   | 0.50 ± 0.02             | 0.25 ± 0.02                 |
| P16 | 0.25 ± 0.02                   | 0.12 ± 0.02              | 0.25 ± 0.02             | 0.25 ± 0.02                   | 0.25 ± 0.02             | 0.50 ± 0.02                 |
| P17 | 0.12 ± 0.02                   | 0.25 ± 0.02              | 1.00 ± 0.06             | 1.00 ± 0.12                   | 0.25 ± 0.04             | 0.25 ± 0.02                 |
| P18 | 0.25 ± 0.04                   | 0.12 ± 0.02              | 0.25 ± 0.02             | 0.50 ± 0.02                   | 0.25 ± 0.06             | 0.25 ± 0.02                 |
| P19 | 0.25 ± 0.02                   | 0.25 ± 0.02              | 0.50 ± 0.02             | 0.50 ± 0.04                   | 1.00 ± 0.12             | 1.00 ± 0.08                 |
| P20 | 0.50 ± 0.02                   | 0.12 ± 0.02              | 0.50 ± 0.04             | 0.50 ± 0.02                   | 0.25 ± 0.04             | 0.25 ± 0.02                 |
| P21 | 0.50 ± 0.02                   | 0.06 ± 0.00              | 0.12 ± 0.02             | 0.50 ± 0.06                   | 0.25 ± 0.04             | 0.25 ± 0.02                 |

**Table S2.** Antimicrobial activities (IZR mm) of seeds extracts from different species.

|     | <i>Listeria monocytogenes</i> | <i>Bacillus subtilis</i> | <i>Proteus vulgaris</i> | <i>Salmonella Typhimurium</i> | <i>Candida albicans</i> | <i>Microsporium gypseum</i> |
|-----|-------------------------------|--------------------------|-------------------------|-------------------------------|-------------------------|-----------------------------|
| P1  | 16.54 ± 0.99                  | 10.89 ± 0.61             | 15.85 ± 0.99            | 10.26 ± 0.57                  | 10.62 ± 1.01            | 11.12 ± 0.77                |
| P2  | 12.14 ± 1.33                  | 10.62 ± 1.16             | 13.12 ± 1.88            | 10.58 ± 1.16                  | 11.89 ± 0.19            | 10.69 ± 0.27                |
| P3  | 11.09 ± 0.99                  | 13.36 ± 1.01             | 16.54 ± 1.25            | 11.69 ± 0.88                  | 9.35 ± 3.55             | 11.23 ± 0.43                |
| P4  | 10.95 ± 0.65                  | 16.21 ± 0.97             | 14.77 ± 1.06            | 14.62 ± 0.87                  | 9.65 ± 0.82             | 10.98 ± 0.98                |
| P5  | 10.32 ± 0.61                  | 8.95 ± 0.53              | 17.14 ± 1.02            | 10.05 ± 0.6                   | 7.12 ± 0.71             | 10.23 ± 1.74                |
| P6  | 14.15 ± 0.84                  | 8.57 ± 0.5               | 16.45 ± 0.97            | 9.68 ± 0.57                   | 6.98 ± 0.44             | 10.65 ± 0.69                |
| P7  | 9.89 ± 0.89                   | 15.79 ± 1.42             | 15.14 ± 1.36            | 11.69 ± 1.05                  | 10.06 ± 0.58            | 10.81 ± 0.62                |
| P8  | 14.56 ± 0.87                  | 13.56 ± 0.15             | 15.31 ± 0.17            | 10.75 ± 0.12                  | 7.03 ± 0.51             | 9.86 ± 0.78                 |
| P9  | 11.12 ± 0.55                  | 10.26 ± 0.51             | 15.29 ± 0.76            | 12.12 ± 0.6                   | 9.89 ± 0.36             | 7.24 ± 0.28                 |
| P10 | 13.65 ± 0.81                  | 16.52 ± 0.26             | 16.71 ± 0.26            | 10.03 ± 0.16                  | 7.65 ± 0.61             | 10.03 ± 0.98                |
| P11 | 10.23 ± 1.02                  | 12.09 ± 1.08             | 16.52 ± 1.48            | 11.26 ± 1.01                  | 9.16 ± 0.73             | 9.78 ± 0.83                 |
| P12 | 16.45 ± 0.32                  | 16.14 ± 0.32             | 16.21 ± 0.32            | 11.02 ± 0.22                  | 9.89 ± 0.79             | 10.56 ± 0.8                 |
| P13 | 9.21 ± 0.59                   | 10.91 ± 0.72             | 16.01 ± 1.05            | 11.65 ± 0.76                  | 7.02 ± 0.53             | 10.78 ± 0.78                |
| P14 | 16.21 ± 2.11                  | 17.21 ± 2.23             | 14.23 ± 1.84            | 10.13 ± 1.31                  | 11.03 ± 0.88            | 9.96 ± 0.23                 |
| P15 | 11.23 ± 0.25                  | 13.16 ± 0.3              | 16.79 ± 0.38            | 14.36 ± 0.33                  | 9.62 ± 0.77             | 11.06 ± 0.8                 |
| P16 | 14.58 ± 0.87                  | 16.89 ± 1.01             | 17.14 ± 1.02            | 15.02 ± 0.9                   | 10.67 ± 1.17            | 9.89 ± 1.48                 |
| P17 | 15.79 ± 0.64                  | 13.95 ± 0.57             | 15.69 ± 0.64            | 15.98 ± 0.65                  | 10.92 ± 0.79            | 11.12 ± 1.06                |
| P18 | 12.78 ± 1.91                  | 15.04 ± 2.25             | 11.04 ± 1.65            | 9.32 ± 1.39                   | 9.93 ± 0.65             | 10.23 ± 0.66                |
| P19 | 12.12 ± 0.24                  | 13.26 ± 0.26             | 12.68 ± 0.25            | 9.98 ± 0.19                   | 10.35 ± 0.75            | 9.06 ± 0.65                 |
| P20 | 10.16 ± 0.61                  | 15.69 ± 0.94             | 16.01 ± 0.96            | 10.96 ± 0.65                  | 10.98 ± 0.37            | 10.26 ± 0.55                |
| P21 | 12.01 ± 0.72                  | 16.81 ± 1.22             | 15.19 ± 1.1             | 10.03 ± 0.73                  | 10.71 ± 0.19            | 11.03 ± 0.2                 |
